# Supplementary material
Source: publisher site journal article supplement (https://www.dovepress.com/get_supplementary_file.php?f=487662.docx)
Supplement: Supplementary file 1 [file get_supplementary_file.php]

**Supplementary file 1. Detailed methods**

**Study setting**

The study was conducted at three medical centers in different geographic distributions in Saudi Arabia. The principal center was King Abdulaziz Medical City (KAMC), a tertiary care institution in Riyadh; the other two centers were King Abdullah bin Abdulaziz University Hospital (Riyadh) and Royal Commission Hospital (Jubail). The study sites of the SCAPE platform were chosen based on their willingness to participate, electronic records availability, and geographic dispersion.

**Study Participants**

The severe acute respiratory syndrome coronavirus 2 (SARS‑CoV‑2) was confirmed using either Reverse Transcriptase-Polymerase Chain Reaction (RT-PCR) nasopharyngeal or throat swabs.

**Data Collection**

Included variables were demographic data (e.g., age, gender, BMI), comorbidities, baseline laboratory data, severity scores [Nutrition Risk in Critically ill (NUTRIC), Acute Physiology and Chronic Health Evaluation II (APACHE II), and Sequential Organ Failure Assessment (SOFA)] were collected. Furthermore, acute kidney injury (AKI) status, respiratory failure, and the use of inotropes/vasopressors were assessed within 24 hours of ICU admission. Additionally, MV parameters [e.g., lowest partial pressure of oxygen/fraction of inspired oxygen (FiO2) ratio], renal profile, liver function tests, coagulation profile [i.e., International normalized ratio (INR), fibrinogen, D-dimer), and other markers (e.g., ferritin, and creatine phosphokinase (CPK)] were collected at baseline. Moreover, enteral nutrition (EN) initiation date, time from ICU admission to EN initiation, refeeding syndrome assessment, total calories and protein, aspiration, and bowel movement were assessed at EN initiation and day three. National Institute for Health and Clinical Excellence (NICE) criteria assessed refeeding syndrome. Lastly, dexamethasone, methylprednisolone, and tocilizumab were collected within 24 hours of ICU admission.

**Study Outcomes Definitions**

- Acute kidney injury (AKI) was defined as a sudden decrease of renal function within 48 h, defined by an increase in absolute SCr of at least 26.5 μmol/L (0.3 mg/dL) or by a percentage increase in SCr ≥ 50% (1.5× baseline value) during ICU stay based on the Acute Kidney Injury Network (AKIN) definition.
- New-onset Afib was defined as a new onset or a first detectable episode of atrial fibrillation (any type), whether symptomatic or not.
- Acute liver injury was defined as an increase in alanine aminotransferase (ALT) more than three times the upper limit of normal or double in patients with elevated baseline ALT.
- Thirty-day mortality was defined as death occurring from any cause within 30 days of admission during hospitalization.
- In-hospital mortality was defined as the percentage of patients with COVID-19 who died in the hospital.

**Statistical analysis**

Cardinality matching is a powerful statistical method to balance the covariates between groups in observational studies, making them comparable without introducing bias. Unlike traditional propensity score matching or greedy algorithms, cardinality matching directly optimizes both sample size and covariate balance by solving a constrained optimization problem. This approach guarantees exact matching for pre-specified covariates while maximizing the total number of matched participants.
 In this study, cardinality matching was used to balance the distributions of critical variables, including age, BMI, NUTRIC score, and baseline clinical characteristics, between the two sub-cohorts, lower and higher protein intake groups. The method assured a one-to-two matching structure, where each participant in the lower protein group was matched to two participants in the higher protein group, thus increasing statistical power while reducing bias.

For descriptive results, median was used to report non-normally distributed data with interquartile range Q1, Q3 and mean with standard deviation used for normally distributed data. Multivariable Cox proportional hazards regression analyses were performed for the 30-day and in-hospital mortality. The proportionality assumption was assessed before fitting the cox model. Visual assessment was performed to assess the assumption by plotting a log(-log) plot and testing the correlation of scaled Schoenfeld residuals with rank-ordered time. Multivariable logistic and negative binomial regression analysis were used as appropriate for the other outcomes considered in this study. Regression analysis was performed by considering a calculated propensity score (PS) as one of the covariates in the model. The Hosmer-Lemeshow goodness-of-fit test was used to evaluate model fit. The hazard ratio (HR), odds ratio (OR), or point estimate with 95% confidence interval (CI) were reported as appropriate. No imputation was made for missing data, as the cohort of patients in our study was not derived from random selection. We considered a P-value of < 0.05 statistically significant. The SAS software was used for all statistical analyses (SAS Version 9.4, SAS Institute Inc. Cary, NC, USA)
